# Supplementary material
Source: ML conference proceedings conference paper supplement (https://openreview.net/forum?id=z3Tf4kdOE5D)
Supplement: supplementary_material [file attachment]

## A APPENDIX

### A.1 PROOF OF LEMMA 4.2.

*Proof.* Notice that for any scalar  $w \in \mathbb{R}^n$  and  $l \leq w \leq u$ , by the definition of  $\mathcal{M}(\cdot; l, u)$ , one can verify that  $\mathbb{E}[\mathcal{M}(w; l, u)] = w$ , therefore  $\mathbb{E}[\mathcal{M}(w; l, u)] = w$ . Furthermore,

$$\begin{aligned}
\mathbb{E}[\|\mathcal{M}(w; l, u) - w\|^2] &= \sum_{j=1}^d \mathbb{E}[(\mathcal{M}(w; l, u)]_j - [w]_j)^2] \\
&= \sum_{j=1}^d (\mathbb{E}[(\mathcal{M}(w; l, u)]_j^2] - [w]_j^2) \\
&= \sum_{j=1}^d ((u+l)[w]_j - lu - [w]_j^2) \\
&= \sum_{j=1}^d \left[ \left( \frac{u-l}{2} \right)^2 - \left( [w]_j - \left( \frac{u+l}{2} \right) \right)^2 \right] \\
&= d \left( \frac{u-l}{2} \right)^2 - \sum_{j=1}^d \left( [w]_j - \left( \frac{u+l}{2} \right) \right)^2 \leq \frac{d(u-l)^2}{4}.
\end{aligned}$$

Moreover,

$$d \left( \frac{u-l}{2} \right)^2 - \sum_{j=1}^d \left( [w]_j - \left( \frac{u+l}{2} \right) \right)^2 =$$

□

### A.2 PROOF OF THEOREM 4.2.

Before proving the Theorem 4.2, a standard probability bound is required.

**Lemma A.1.** Let  $\{X_i\}_{i=1}^n$  be a sequence of i.i.d continuous random variables, whose support is on  $\mathbb{R}$ . Then for any  $b \in \mathbb{R}$

$$\mathbb{P} \left( \max_{i \in [n]} X_i \geq b \right) \leq n\mathbb{P}(X_i \geq b).$$

*Proof.*

$$\begin{aligned}
\mathbb{P} \left( \max_{i \in [n]} X_i \geq b \right) &= 1 - \mathbb{P}(\max_{i \in [n]} X_i \leq b) = 1 - \mathbb{P}(X_1 \leq b, \dots, X_n \leq b) \\
&= 1 - \prod_{j=1}^n \mathbb{P}(X_j \leq b) = 1 - (1 - \mathbb{P}(X_j \geq b))^n \text{ for any } j
\end{aligned}$$

Let  $f(t) := 1 - nt - (1-t)^n$  for  $t \in [0, 1]$ . As  $f'(t) \leq 0$  and  $f(0) = 0$ ,  $f(t) \leq 0$  for all  $t \in [0, 1]$ . Therefore,  $1 - (1-t)^n \leq nt$ . Take  $t = \mathbb{P}(X_j \geq b)$ , we arrive

$$\mathbb{P} \left( \max_{i \in [n]} X_i \geq b \right) \leq n\mathbb{P}(X_i \geq b).$$

□

Now we are ready to prove Theorem 4.2.

*Proof.* For any  $j \in [d]$ ,  $|[\bar{\mathbf{w}}^t]_j - [\bar{\mathbf{w}}_{\mathcal{M}}^t]_j| \leq u^t - l^t$  and  $\mathbf{Var}([\bar{\mathbf{w}}^t]_j - [\bar{\mathbf{w}}_{\mathcal{M}}^t]_j) \leq (u^t - l^t)^2/4$  due to Lemma 4.1. By Bernstein inequality, for any  $j \in [d]$  and  $\epsilon > 0$

$$\begin{aligned} \mathbb{P}(|[\bar{\mathbf{w}}^t]_j - [\bar{\mathbf{w}}_{\mathcal{M}}^t]_j| \geq \epsilon) &\leq 2 \exp\left(-\frac{K\epsilon^2}{2\frac{1}{K}\sum_{i \in S_t} \mathbf{Var}([\bar{\mathbf{w}}^t]_j - [\bar{\mathbf{w}}_{\mathcal{M}}^t]_j) + \frac{2}{3}\epsilon(u^t - l^t)}\right) \\ &\leq 2 \exp\left(-\frac{K\epsilon^2}{\frac{(u^t - l^t)^2}{2} + \frac{2}{3}\epsilon(u^t - l^t)}\right) \end{aligned}$$

By Lemma A.1,

$$\mathbb{P}\left(\max_{j \in [d]} |[\bar{\mathbf{w}}^t]_j - [\bar{\mathbf{w}}_{\mathcal{M}}^t]_j| \geq \epsilon\right) \leq 2d \exp\left(-\frac{K\epsilon^2}{\frac{(u^t - l^t)^2}{2} + \frac{2}{3}\epsilon(u^t - l^t)}\right)$$

Therefore, for any  $\beta > 0$ , there exists  $\epsilon = \mathcal{O}\left(\frac{(u^t - l^t)\sqrt{\log \frac{2d}{\beta}}}{\sqrt{K}}\right)$  such that  $\mathbb{P}(\max_{j \in [d]} |[\bar{\mathbf{w}}^t]_j - [\bar{\mathbf{w}}_{\mathcal{M}}^t]_j| \leq \epsilon)$  holds with probability at least  $1 - \beta$ .  $\square$

### A.3 PROOF OF THEOREM 4.3

*Proof.* Due to the weight discretization mechanism, the adversary can only return  $u$  or  $l$  for each coordinate of the model weight. In order to not return the correct information, the adversary could choose to return the opposite feedback to attack the model, i.e., return  $u$  if the original return is  $l$ , and vice versa. Therefore, we denote, for any  $l \leq w \leq u$ ,

$$\mathcal{M}_{\text{adv}}(w) = \begin{cases} l, & \text{w.p. } \frac{w-l}{h-l} \\ h, & \text{w.p. } \frac{h-w}{h-l} \end{cases}$$

Under the scenario that there are  $F$  attackers, for any  $j \in [d]$ ,

$$\begin{aligned} [\mathbb{E}[\bar{\mathbf{w}}_{\mathcal{M}}]]_j &= \mathbb{E}\left[\frac{1}{N}\left(\sum_{i=1}^{N-F} [\mathcal{M}(\mathbf{w}_i)]_j + \sum_{i=N-F+1}^N [\mathcal{M}_{\text{adv}}(\mathbf{w}_i)]_j\right)\right] \\ &= \frac{1}{N} \sum_{i=1}^{N-F} [\mathbf{w}_i]_j + \frac{1}{N} \sum_{i=N-F+1}^N ((h+l) - [\mathbf{w}_i]_j) \end{aligned} \quad (4)$$

$$= \frac{1}{N} \left( \sum_{i=1}^{N-F} [\mathbf{w}_i]_j - \sum_{i=N-F+1}^N [\mathbf{w}_i]_j \right) + (h+l) \frac{F}{N}. \quad (5)$$

$\square$

### A.4 PROOF OF THEOREM 4.4

*Proof.* The proof is inspired by the analysis in Theorem 4 of (Li et al., 2020).

To proceed with the analysis, we first introduce some notations. At the  $t$ th round, for the all  $i \in \mathcal{S}'_t$ , define  $\hat{\mathbf{w}}^{t+1} = \mathbf{w}^t + \frac{1}{|\mathcal{S}'_t|} \sum_{i \in \mathcal{S}'_t} (\mathbf{w}_i^{t+1} - \mathbf{w}^t)$ ,  $\bar{\mathbf{w}}^{t+1} = \mathbf{w}^t + \sum_{i \in [N]} p_i (\mathbf{w}_i^{t+1} - \mathbf{w}^t)$ , and  $\hat{\mathbf{w}}_i^{t+1} = \arg \min_{\mathbf{w}} h_i(\mathbf{w}; \mathbf{w}^t) := F_i(\mathbf{w}) + \frac{\mu}{2} \|\mathbf{w} - \mathbf{w}^t\|^2$ .  $\tilde{\mathbf{w}}^{t+1}$  is the ghost global model as if the discretization mechanism is not applied to the local model weights;  $\bar{\mathbf{w}}^{t+1}$  is another ghost global model as if all clients participate in the  $t$ th round training and no discretization mechanism is applied;  $\hat{\mathbf{w}}_i^{t+1}$  is the exact minimizer of the strongly convex function  $h_i(\mathbf{w})$ . These points reference points are crucial for the analysis. Define the gradient residual  $\mathbf{e}_i^{t+1} = \nabla F_i(\mathbf{w}_i^{t+1}) + \mu(\mathbf{w}_i^{t+1} - \mathbf{w}^t)$ , then  $\mathbf{w}_i^{t+1} - \mathbf{w}^t = -\frac{1}{\mu} \nabla F_i(\mathbf{w}_i^{t+1}) + \frac{1}{\mu} \mathbf{e}_i^{t+1}$ . Therefore,

$$\bar{\mathbf{w}}^{t+1} - \mathbf{w}^t = \sum_{i \in [n]} p_i (\mathbf{w}_i^{t+1} - \mathbf{w}^t) = -\frac{1}{\mu} \sum_{i \in [n]} p_i \nabla F_i(\mathbf{w}_i^{t+1}) + \frac{1}{\mu} \sum_{i \in [n]} p_i \mathbf{e}_i^{t+1}. \quad (6)$$

Since  $\mu$  is chosen to satisfy  $\mu > \lambda_{\min}$ , then  $h_i(\mathbf{w}; \mathbf{w}^t)$  is  $\bar{\mu}$ -strongly convex. By the strong convexity of  $h_i$ ,

$$\begin{aligned} \|\mathbf{w}_i^{t+1} - \hat{\mathbf{w}}_i^{t+1}\|^2 &\leq \frac{1}{\bar{\mu}} (\mathbf{w}_i^{t+1} - \hat{\mathbf{w}}_i^{t+1})^\top (\nabla h_i(\mathbf{w}_i^{t+1}) - \nabla h_i(\hat{\mathbf{w}}_i^{t+1})) \\ &\leq \frac{1}{\bar{\mu}} \|\mathbf{w}_i^{t+1} - \hat{\mathbf{w}}_i^{t+1}\| \|\nabla h_i(\mathbf{w}_i^{t+1}) - \nabla h_i(\hat{\mathbf{w}}_i^{t+1})\|, \end{aligned}$$

which, together with the fact that  $\hat{\mathbf{w}}_i^{t+1}$  is the minimizer of  $h_i(\mathbf{w})$ , implies

$$\begin{aligned} \|\mathbf{w}_i^{t+1} - \hat{\mathbf{w}}_i^{t+1}\| &\leq \frac{1}{\bar{\mu}} \|\nabla h_i(\mathbf{w}_i^{t+1}) - \nabla h_i(\hat{\mathbf{w}}_i^{t+1})\| \\ &= \frac{1}{\bar{\mu}} \|\nabla h_i(\hat{\mathbf{w}}_i^{t+1})\| = \frac{1}{\bar{\mu}} \|\nabla F_i(\mathbf{w}_i^{t+1}) + \mu(\mathbf{w}_i^{t+1} - \mathbf{w}^t)\| \\ &\leq \frac{\gamma}{\bar{\mu}} \|\nabla F_i(\mathbf{w}^t)\| \end{aligned} \quad (7)$$

Again use the same analysis, one has  $\|\hat{\mathbf{w}}_i^{t+1} - \mathbf{w}^t\| \leq \frac{1}{\bar{\mu}} \|\nabla F_i(\mathbf{w}^t)\|$ . Therefore, together with Eq. 7,

$$\|\mathbf{w}_i^{t+1} - \mathbf{w}^t\| \leq \|\mathbf{w}_i^{t+1} - \hat{\mathbf{w}}_i^{t+1}\| + \|\hat{\mathbf{w}}_i^{t+1} - \mathbf{w}^t\| \leq \frac{1+\gamma}{\bar{\mu}} \|\nabla F_i(\mathbf{w}^t)\|. \quad (8)$$

Therefore, one can bound the distance from the ghost global model  $\bar{\mathbf{w}}^{t+1}$  to the current global weight as

$$\begin{aligned} \|\bar{\mathbf{w}}^{t+1} - \mathbf{w}^t\| &= \left\| \sum_{i \in [N]} p_i (\mathbf{w}_i^{t+1} - \mathbf{w}^t) \right\| \leq \sum_{i \in [N]} p_i \|\mathbf{w}_i^{t+1} - \mathbf{w}^t\| \\ &\leq \frac{1+\gamma}{\bar{\mu}} \sum_{i \in [N]} p_i \|\nabla F_i(\mathbf{w}^t)\| \quad (\text{by Eq. 8}) \\ &\leq \frac{1+\gamma}{\bar{\mu}} \sqrt{\sum_{i \in [N]} p_i \|\nabla F_i(\mathbf{w}^t)\|^2} \quad (\text{Jensen' Inequality}) \\ &= \frac{1+\gamma}{\bar{\mu}} \sqrt{\mathbb{E}_i[\|\nabla F_i(\mathbf{w}^t)\|^2]} \\ &\leq \frac{B(1+\gamma)}{\bar{\mu}} \|\nabla f(\mathbf{w}^t)\| \quad (\text{by Assumption 4.1 (3)}) \end{aligned} \quad (9)$$

Note that

$$\begin{aligned} \left\| \sum_{i \in [n]} p_i (\nabla F_i(\mathbf{w}_i^{t+1}) - e_i^{t+1} - \nabla F_i(\mathbf{w}^t)) \right\| &\leq \sum_{i \in [n]} p_i (\|\nabla F_i(\mathbf{w}_i^{t+1}) - \nabla F_i(\mathbf{w}^t)\| + \|e_i^{t+1}\|) \\ &\leq \sum_{i \in [n]} p_i (L \|\mathbf{w}_i^{t+1} - \mathbf{w}^t\| + \|e_i^{t+1}\|) \\ &\stackrel{\text{Eq. 8}}{\leq} \left( \frac{L(1+\gamma)}{\bar{\mu}} + \gamma \right) \sum_{i \in [n]} p_i \|\nabla F_i(\mathbf{w}^t)\| \\ &= \left( \frac{L(1+\gamma)}{\bar{\mu}} + \gamma \right) \mathbb{E}_i[\|\nabla F_i(\mathbf{w}^t)\|] \\ &\stackrel{\text{Eq. 8}}{\leq} B \left( \frac{L(1+\gamma)}{\bar{\mu}} + \gamma \right) \|\nabla f(\mathbf{w}^t)\|. \end{aligned} \quad (10)$$

By Assumption 4.1 (1), one has

$$\begin{aligned}
f(\bar{\mathbf{w}}^{t+1}) &\leq f(\mathbf{w}^t) + \nabla f(\mathbf{w}^t)^\top (\bar{\mathbf{w}}^{t+1} - \mathbf{w}^t) + \frac{L}{2} \|\bar{\mathbf{w}}^{t+1} - \mathbf{w}^t\|^2 \\
&\stackrel{\text{Eq. 6}}{\leq} f(\mathbf{w}^t) + \nabla f(\mathbf{w}^t)^\top \left( -\frac{1}{\mu} \sum_{i \in [n]} p_i \nabla F_i(\mathbf{w}_i^{t+1}) + \frac{1}{\mu} \sum_{i \in [n]} p_i e_i^{t+1} \right) + \frac{L}{2} \|\bar{\mathbf{w}}^{t+1} - \mathbf{w}^t\|^2 \\
&= f(\mathbf{w}^t) + \nabla f(\mathbf{w}^t)^\top \left( -\frac{1}{\mu} \sum_{i \in [n]} p_i (\nabla F_i(\mathbf{w}_i^{t+1}) - e_i^{t+1} - \nabla F_i(\mathbf{w}^t)) - \frac{1}{\mu} \nabla f(\mathbf{w}^t) \right) \\
&\quad + \frac{L}{2} \|\bar{\mathbf{w}}^{t+1} - \mathbf{w}^t\|^2 \\
&\leq f(\mathbf{w}^t) - \frac{1}{\mu} \|f(\mathbf{w}^t)\|^2 - \frac{1}{\mu} f(\mathbf{w}^t)^\top \left( \sum_{i \in [n]} p_i (\nabla F_i(\mathbf{w}_i^{t+1}) - e_i^{t+1} - \nabla F_i(\mathbf{w}^t)) \right) \\
&\quad + \frac{L}{2} \|\bar{\mathbf{w}}^{t+1} - \mathbf{w}^t\|^2 \\
&\leq f(\mathbf{w}^t) - \frac{1}{\mu} \|f(\mathbf{w}^t)\|^2 + \frac{1}{\mu} \|f(\mathbf{w}^t)\| \left\| \sum_{i \in [n]} p_i (\nabla F_i(\mathbf{w}_i^{t+1}) - e_i^{t+1} - \nabla F_i(\mathbf{w}^t)) \right\| \\
&\quad + \frac{L}{2} \|\bar{\mathbf{w}}^{t+1} - \mathbf{w}^t\|^2 \\
&\stackrel{\text{Eq. 10, Eq. 9}}{\leq} f(\mathbf{w}^t) - \frac{1}{\mu} \|f(\mathbf{w}^t)\|^2 + \frac{B}{\mu} \left( \frac{L(1+\gamma)}{\bar{\mu}} + \gamma \right) \|\nabla f(\mathbf{w}^t)\|^2 + \frac{L}{2} \left( \frac{B(1+\gamma)}{\bar{\mu}} \right)^2 \|\nabla f(\mathbf{w}^t)\|^2 \\
&\tag{11} \\
&= f(\mathbf{w}^t) - \left( \frac{1-\gamma B}{\mu} - \frac{LB(1+\gamma)}{\mu \bar{\mu}} - \frac{L(1+\gamma)^2 B^2}{2\bar{\mu}^2} \right) \|\nabla f(\mathbf{w}^t)\|^2 \\
&\tag{12}
\end{aligned}$$

By mean-value theorem and triangular inequality, for some  $\alpha \in [0, 1]$

$$\begin{aligned}
f(\tilde{\mathbf{w}}^{t+1}) &\leq f(\bar{\mathbf{w}}^{t+1}) + \|\nabla f(\alpha \tilde{\mathbf{w}}^{t+1} + (1-\alpha)\bar{\mathbf{w}}^{t+1})\| \|\tilde{\mathbf{w}}^{t+1} - \bar{\mathbf{w}}^{t+1}\| \\
&\leq f(\bar{\mathbf{w}}^{t+1}) + (\|\nabla f(\alpha \tilde{\mathbf{w}}^{t+1} + (1-\alpha)\bar{\mathbf{w}}^{t+1}) - \nabla f(\mathbf{w}^t)\| + \|\nabla f(\mathbf{w}^t)\|) \|\tilde{\mathbf{w}}^{t+1} - \bar{\mathbf{w}}^{t+1}\| \\
&\leq f(\bar{\mathbf{w}}^{t+1}) + (L \|\alpha \tilde{\mathbf{w}}^{t+1} + (1-\alpha)\bar{\mathbf{w}}^{t+1} - \mathbf{w}^t\| + \|\nabla f(\mathbf{w}^t)\|) \|\tilde{\mathbf{w}}^{t+1} - \bar{\mathbf{w}}^{t+1}\| \\
&\leq f(\bar{\mathbf{w}}^{t+1}) + (L(\|\tilde{\mathbf{w}}^{t+1} - \mathbf{w}^t\| + \|\bar{\mathbf{w}}^{t+1} - \mathbf{w}^t\|) + \|\nabla f(\mathbf{w}^t)\|) \|\tilde{\mathbf{w}}^{t+1} - \bar{\mathbf{w}}^{t+1}\| \\
&\tag{13}
\end{aligned}$$

Taking expectation with respect to the random index set  $\mathcal{S}'_t$ , one gets

$$\begin{aligned}
\mathbb{E}_{\mathcal{S}'_t}[f(\tilde{\mathbf{w}}^{t+1})] &\leq f(\bar{\mathbf{w}}^{t+1}) + (L \|\bar{\mathbf{w}}^{t+1} - \mathbf{w}^t\| + \|\nabla f(\mathbf{w}^t)\|) \mathbb{E}_{\mathcal{S}'_t} \|\tilde{\mathbf{w}}^{t+1} - \bar{\mathbf{w}}^{t+1}\| \\
&\quad + L \mathbb{E}_{\mathcal{S}'_t} [\|\tilde{\mathbf{w}}^{t+1} - \mathbf{w}^t\| \|\bar{\mathbf{w}}^{t+1} - \bar{\mathbf{w}}^{t+1}\|] \\
&\leq f(\bar{\mathbf{w}}^{t+1}) + (L \|\bar{\mathbf{w}}^{t+1} - \mathbf{w}^t\| + \|\nabla f(\mathbf{w}^t)\|) \mathbb{E}_{\mathcal{S}'_t} \|\tilde{\mathbf{w}}^{t+1} - \bar{\mathbf{w}}^{t+1}\| \\
&\quad + L \mathbb{E}_{\mathcal{S}'_t} [\|\tilde{\mathbf{w}}^{t+1} - \bar{\mathbf{w}}^{t+1}\| + \|\bar{\mathbf{w}}^{t+1} - \mathbf{w}^t\|] \|\tilde{\mathbf{w}}^{t+1} - \bar{\mathbf{w}}^{t+1}\| \\
&= f(\bar{\mathbf{w}}^{t+1}) + (2L \|\bar{\mathbf{w}}^{t+1} - \mathbf{w}^t\| + \|\nabla f(\mathbf{w}^t)\|) \mathbb{E}_{\mathcal{S}'_t} \|\tilde{\mathbf{w}}^{t+1} - \bar{\mathbf{w}}^{t+1}\| \\
&\quad + L \mathbb{E}_{\mathcal{S}'_t} [\|\tilde{\mathbf{w}}^{t+1} - \bar{\mathbf{w}}^{t+1}\|^2] \\
&\tag{14}
\end{aligned}$$

By the sampling scheme, one has

$$\begin{aligned}
\mathbb{E}_{S'_t} \|\tilde{\mathbf{w}}^{t+1} - \bar{\mathbf{w}}^{t+1}\|^2 &\leq \frac{1}{|S'_t|} \mathbb{E}_i [\|\mathbf{w}_i^{t+1} - \bar{\mathbf{w}}^{t+1}\|^2] \\
&\leq \frac{1}{|S'_t|} \mathbb{E}_i [\|\mathbf{w}_i^{t+1} - \mathbf{w}^t\|^2 + \|\mathbf{w}^t - \bar{\mathbf{w}}^{t+1}\|^2 + 2(\mathbf{w}_i^{t+1} - \mathbf{w}^t)^\top (\mathbf{w}^t - \bar{\mathbf{w}}^{t+1})] \\
&\leq \frac{1}{|S'_t|} \mathbb{E}_i [\|\mathbf{w}_i^{t+1} - \mathbf{w}^t\|^2] \quad (\text{by } \mathbb{E}_i(\mathbf{w}_i^{t+1}) = \bar{\mathbf{w}}^{t+1}) \\
&\stackrel{\text{Eq. 8}}{\leq} \frac{1}{|S'_t|} \frac{(1+\gamma)^2}{\bar{\mu}^2} \mathbb{E}_i [\|\nabla F_i(\mathbf{w}^t)\|^2] \\
&\leq \frac{B^2}{|S'_t|} \frac{(1+\gamma)^2}{\bar{\mu}^2} \|\nabla f(\mathbf{w}^t)\|^2 \quad (\text{by Assumption 4.1 (3)}). \tag{15}
\end{aligned}$$

Combining Eq. 14, Eq. 15, and Eq. 9, together with the fact that  $\mathbb{E}_{S'_t} \|\tilde{\mathbf{w}}^{t+1} - \bar{\mathbf{w}}^{t+1}\| \leq \sqrt{\mathbb{E}_{S'_t} \|\tilde{\mathbf{w}}^{t+1} - \bar{\mathbf{w}}^{t+1}\|^2}$  as a result of the Jensen's inequality, one reaches to

$$\begin{aligned}
\mathbb{E}_{S'_t} [f(\tilde{\mathbf{w}}^{t+1})] &\leq f(\bar{\mathbf{w}}^{t+1}) + \left( 2L \frac{B^2}{\sqrt{|S'_t|}} \frac{(1+\gamma)^2}{\bar{\mu}^2} + \frac{B}{\sqrt{|S'_t|}} \frac{(1+\gamma)}{\bar{\mu}} + L \frac{B^2}{|S'_t|} \frac{(1+\gamma)^2}{\bar{\mu}^2} \right) \|\nabla f(\mathbf{w}^t)\|^2 \\
&= f(\bar{\mathbf{w}}^{t+1}) + \left( \frac{LB^2(1+\gamma)^2}{|S'_t|\bar{\mu}^2} (2\sqrt{|S'_t|} + 1) + \frac{B(1+\gamma)}{\bar{\mu}\sqrt{|S'_t|}} \right) \|\nabla f(\mathbf{w}^t)\|^2. \tag{16}
\end{aligned}$$

Combine Eq. 16 and Eq. 11, one reaches to

$$\begin{aligned}
\mathbb{E}_{S'_t} [f(\tilde{\mathbf{w}}^{t+1})] &\leq f(\mathbf{w}^t) - \left( \frac{1-\gamma B}{\mu} - \frac{LB(1+\gamma)}{\mu\bar{\mu}} - \frac{L(1+\gamma)^2 B^2}{2\bar{\mu}^2} - \right. \\
&\quad \left. \left( \frac{LB^2(1+\gamma)^2}{|S'_t|\bar{\mu}^2} (2\sqrt{|S'_t|} + 1) + \frac{B(1+\gamma)}{\bar{\mu}\sqrt{|S'_t|}} \right) \right) \|\nabla f(\mathbf{w}^t)\|^2 \tag{17}
\end{aligned}$$

Taking the expectation with respect to the discretization mechanism,  $\mathbb{E}_{\mathcal{M}}[\mathbf{w}^{t+1}] = \tilde{\mathbf{w}}^{t+1}$  by Lemma 4.1. Since  $f$  is  $L$ -smooth,

$$\begin{aligned}
\mathbb{E}_{\mathcal{M}}[f(\mathbf{w}^{t+1})] &\leq f(\tilde{\mathbf{w}}^{t+1}) + \frac{L}{2} \mathbb{E}_{\mathcal{M}}[\|\mathbf{w}^{t+1} - \tilde{\mathbf{w}}^{t+1}\|^2] \\
&= f(\tilde{\mathbf{w}}^{t+1}) + \frac{L}{2} \frac{1}{|\mathcal{S}'_t|^2} \mathbb{E}_{\mathcal{M}} \left[ \left\| \sum_{i \in \mathcal{S}'_t} (\mathcal{M}(\mathbf{w}_i^{t+1} - \mathbf{w}) - (\mathbf{w}_i^{t+1} - \mathbf{w})) \right\|^2 \right] \\
&\leq f(\tilde{\mathbf{w}}^{t+1}) + \frac{L}{8|\mathcal{S}'_t|^2} \left\| \sum_{i \in \mathcal{S}'_t} (\mathbf{w}_i^{t+1} - \mathbf{w}) \right\|^2 \quad (\text{by Lemma 4.1}) \\
&\leq f(\tilde{\mathbf{w}}^{t+1}) + \frac{L}{8|\mathcal{S}'_t|^2} \left( \sum_{i \in [n]} \|\mathbf{w}_i^{t+1} - \mathbf{w}\|^2 + \sum_{i \neq j} (\mathbf{w}_i^{t+1} - \mathbf{w})^\top (\mathbf{w}_j^{t+1} - \mathbf{w}) \right) \\
&\leq f(\tilde{\mathbf{w}}^{t+1}) + \frac{L}{8|\mathcal{S}'_t|^2} \left( \sum_{i \in [n]} \|\mathbf{w}_i^{t+1} - \mathbf{w}\|^2 + \sum_{i \neq j} \|\mathbf{w}_i^{t+1} - \mathbf{w}\| \|\mathbf{w}_j^{t+1} - \mathbf{w}\| \right) \\
&\leq f(\tilde{\mathbf{w}}^{t+1}) + \frac{LN}{8|\mathcal{S}'_t|^2} \left( \sum_{i \in [n]} \|\mathbf{w}_i^{t+1} - \mathbf{w}\|^2 \right) \quad (\text{by } 2\|a\|\|b\| \leq \|a\|^2 + \|b\|^2) \\
&\leq f(\tilde{\mathbf{w}}^{t+1}) + \frac{LN}{8|\mathcal{S}'_t|^2 p_{\min}} \left( \sum_{i \in [n]} p_{\min} \|\mathbf{w}_i^{t+1} - \mathbf{w}\|^2 \right) \\
&\leq f(\tilde{\mathbf{w}}^{t+1}) + \frac{LN}{8|\mathcal{S}'_t|^2 p_{\min}} \left( \sum_{i \in [n]} p_i \|\mathbf{w}_i^{t+1} - \mathbf{w}\|^2 \right) \\
&\leq f(\tilde{\mathbf{w}}^{t+1}) + \frac{LN}{8|\mathcal{S}'_t|^2 p_{\min}} \left( \sum_{i \in [n]} p_i \frac{(1+\gamma)^2}{\bar{\mu}^2} \|\nabla F_i(\mathbf{w}^t)\|^2 \right) \\
&\leq f(\tilde{\mathbf{w}}^{t+1}) + \frac{LN}{8|\mathcal{S}'_t|^2 p_{\min}} \frac{B^2(1+\gamma)^2}{\bar{\mu}^2} \|\nabla f(\mathbf{w}^t)\|^2 \tag{18}
\end{aligned}$$

Put Eq. 18 and Eq. 17 together, we reach to

$$\begin{aligned}
\mathbb{E}_{\mathcal{M}, \mathcal{S}'_t}[f(\mathbf{w}^{t+1})] &\leq f(\mathbf{w}^t) - \left( \frac{1-\gamma B}{\mu} - \frac{LB(1+\gamma)}{\mu \bar{\mu}} - \frac{L(1+\gamma)^2 B^2}{2\bar{\mu}^2} - \right. \\
&\quad \left. \left( \frac{LB^2(1+\gamma)^2}{|\mathcal{S}'_t| \bar{\mu}^2} (2\sqrt{|\mathcal{S}'_t|} + 1) + \frac{B(1+\gamma)}{\bar{\mu} \sqrt{|\mathcal{S}'_t|}} \right) - \frac{LNB^2(1+\gamma)^2}{8|\mathcal{S}'_t|^2 p_{\min} \bar{\mu}^2} \right) \|\nabla f(\mathbf{w}^t)\|^2 \tag{19}
\end{aligned}$$

When there is no adversary, then  $|\mathcal{S}'| = K$ , then

$$\mathbb{E}_{\mathcal{M}, \mathcal{S}'_t}[f(\mathbf{w}^{t+1})] \leq f(\mathbf{w}^t) - \kappa \|\nabla f(\mathbf{w}^t)\|^2$$

Finally, taking the total expectation with respect to all randomness and by telescoping, one reaches

$$\kappa \sum_{t=0}^{T-1} \mathbb{E}[\|\nabla f(\mathbf{w}_t)\|^2] \leq f(\mathbf{w}_0) - f(\mathbf{w}^*).$$

Divide  $T$  on both sides, then

$$\min_{t \in [T-1]} \mathbb{E}[\|\nabla f(\mathbf{w}_t)\|] \leq \frac{1}{T} \sum_{t=0}^{T-1} \mathbb{E}[\|\nabla f(\mathbf{w}_t)\|^2] \leq \frac{f(\mathbf{w}_0) - f(\mathbf{w}^*)}{\kappa T}.$$

□
